# Supplementary material for: Visual detection of Listeria monocytogenes using unmodified gold nanoparticles based on a novel marker
Source: Royal Society of Chemistry journal article supplement (doi:10.1039/c5ay01367d), 2015-01-01
Supplement: c5ay01367d1.pdf [file c5ay01367d1.pdf]

Supplement data

226bp of PCR product:

gattcactg taagccattt cgtcacata atcaatfff gcactfacat ttggataagcttgagcatat tttcattcc atctttccac  
taatgtatt actgcgttg taacgtttgatttagtgcca tttttacaa cgattttatt gtcttgatta gtcatacctg  
gcaaatcaatgctgagtgt aatgaatcac gttttacagg gagaacatct ggttgat

The molecular weight of the product is 65561.
